# Supplementary material for: Overexpression of denticleless E3 ubiquitin protein ligase homolog (DTL) is related to poor outcome in gastric carcinoma
Source: PubMed Central journal article supplement (PMC4742199; doi:10.18632/oncotarget.5620), 2015-10-13
Supplement: oncotarget-06-36615-s001.pdf [file oncotarget-06-36615-s001.pdf]

## SUPPLEMENTARY TABLE

Supplementary Table S1: Multivariate analysis for disease-free survival using stepwise Cox regression procedures

| Variables                     | Univariate <sup>a</sup> |                 | Multivariate <sup>b</sup> |   |                |                   |
|-------------------------------|-------------------------|-----------------|---------------------------|---|----------------|-------------------|
|                               | <i>P</i> value          | HR <sup>c</sup> | 95%CI <sup>d</sup>        |   | <i>P</i> value |                   |
| Gender                        |                         |                 |                           |   |                |                   |
| male <i>versus</i> female     | 0.6723                  |                 |                           | – |                |                   |
| Age                           |                         |                 |                           |   |                |                   |
| ≥60 <i>versus</i> < 60        | 0.1342                  |                 |                           | – |                |                   |
| Histological type             |                         |                 |                           |   |                |                   |
| Undiffe. <i>versus</i> Diffe. | 0.9462                  |                 |                           | – |                |                   |
| Tumor size (mm)               |                         |                 |                           |   |                |                   |
| ≥25 <i>versus</i> < 25        | <b>&lt;0.0005</b>       |                 |                           | – |                |                   |
| Venous invasion               |                         |                 |                           |   |                |                   |
| v2–3 <i>versus</i> v0–1       | <b>&lt;0.005</b>        | 3.179           | 1.081                     | – | 9.348          | <b>0.0356</b>     |
| Lymphatic invasion            |                         |                 |                           |   |                |                   |
| ly2–3 <i>versus</i> ly0–1     | <b>&lt;0.0001</b>       | 12.73           | 4.012                     | – | 40.40          | <b>&lt;0.0001</b> |
| pT-stage                      |                         |                 |                           |   |                |                   |
| T4 <i>versus</i> T1–3         | <b>&lt;0.0001</b>       |                 |                           | – |                |                   |
| pN-stage                      |                         |                 |                           |   |                |                   |
| N3 <i>versus</i> N0–2         | <b>&lt;0.0001</b>       | 6.969           | 2.488                     | – | 19.53          | <b>0.0002</b>     |
| DTL expression                |                         |                 |                           |   |                |                   |
| high <i>versus</i> low        | <b>0.0324</b>           | 3.897           | 1.451                     | – | 10.46          | <b>0.0070</b>     |

<sup>a</sup>Kaplan and Meier method, and the statistical significance was determined by log-rank test

<sup>b</sup>Multivariate survival analysis was performed using Cox's proportional hazard model

<sup>c</sup>HR:hazard ratio

<sup>d</sup>CI:confidence interval
